# Supplementary material for: A study on the formation of the nitro radical anion by ornidazole and its significant decrease in a structurally characterized binuclear Cu(II)-complex: impact in biology
Source: Royal Society of Chemistry journal article supplement (doi:10.1039/c4dt03362k), 2014-11-26
Supplement: c4dt03362k1.pdf [file c4dt03362k1.pdf]

## Supplementary Information for

**A study on the formation of the nitro radical anion by ornidazole and its significant decrease in a structurally characterized binuclear Cu<sup>(II)</sup>-complex: impact in biology**

by

**Ramesh Chandra Santra, Durba Ganguly, Jyotsna Singh, Kasturi Mukhopadhyay,**

**Saurabh Das**

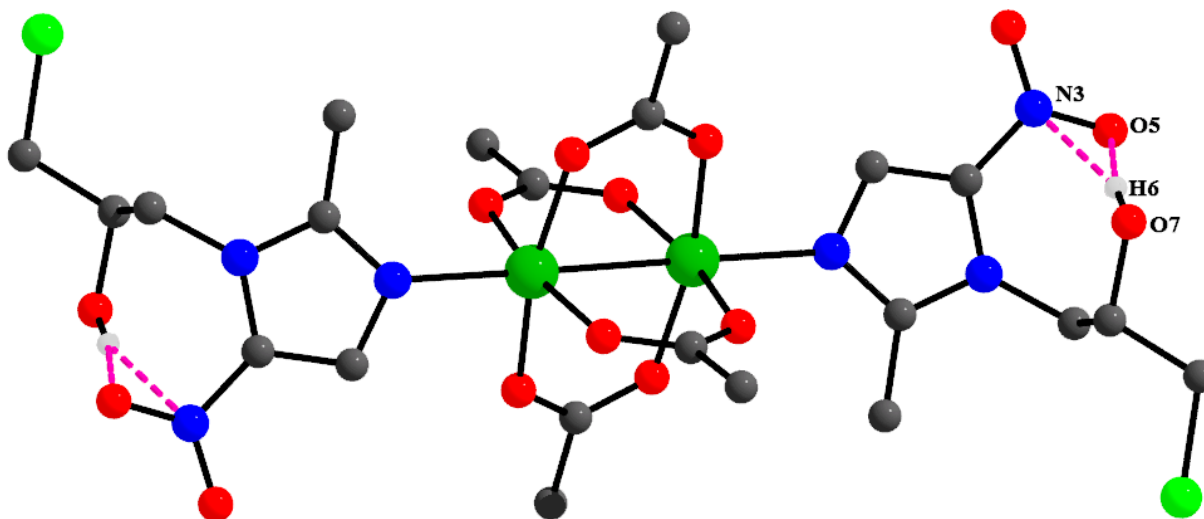

Figure S1: Hydrogen bonding interactions in  $[\text{Cu}_2(\text{OAc})_4(\text{Onz})_2]$ . Only the relevant hydrogen atoms are shown.

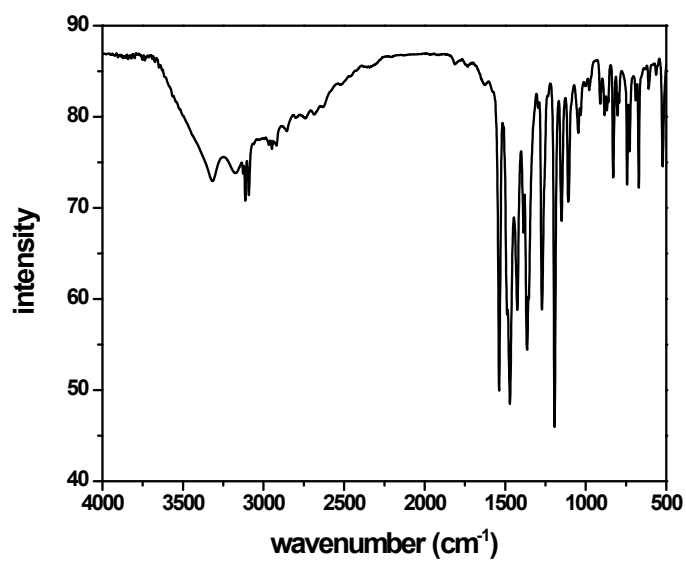

Figure S2: I R spectrum of Ornidazole

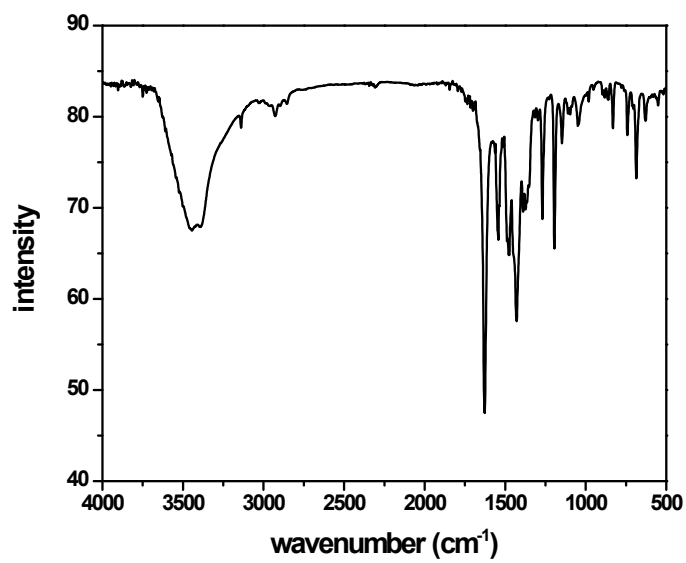

Figure S3: I R spectrum of [Cu<sub>2</sub>(OAc)<sub>4</sub>(Onz)<sub>2</sub>]

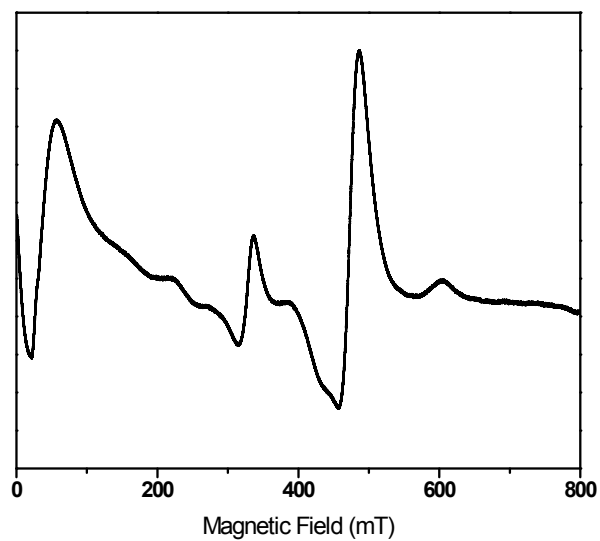

Figure S4: EPR spectrum of  $[\text{Cu}_2(\text{OAc})_4(\text{Onz})_2]$

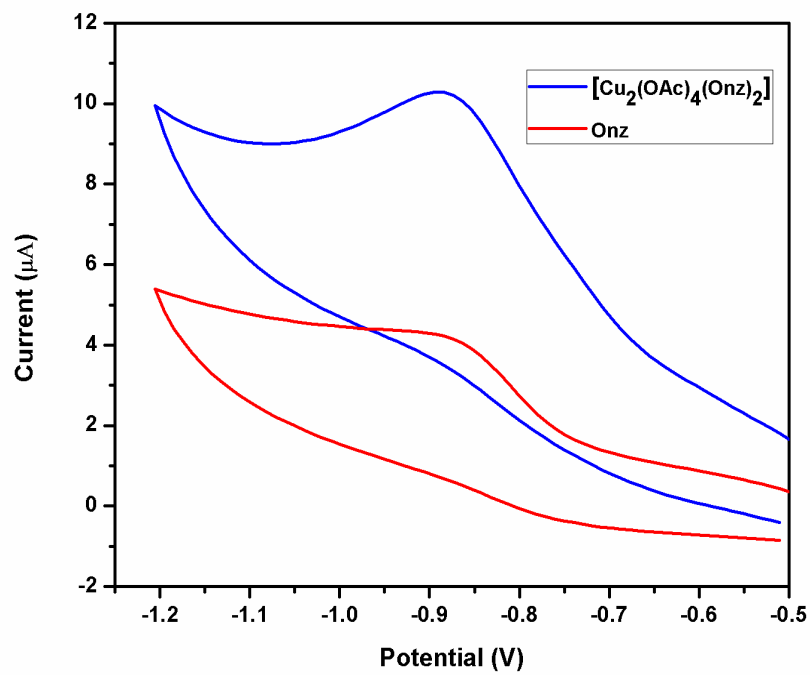

Figure S5: Cyclic voltammogram of 250  $\mu\text{M}$  Onz and  $[\text{Cu}_2(\text{OAc})_4(\text{onz})_2]$  at scan rate 0.1 V/sec in aqueous medium at pH = 7.4.

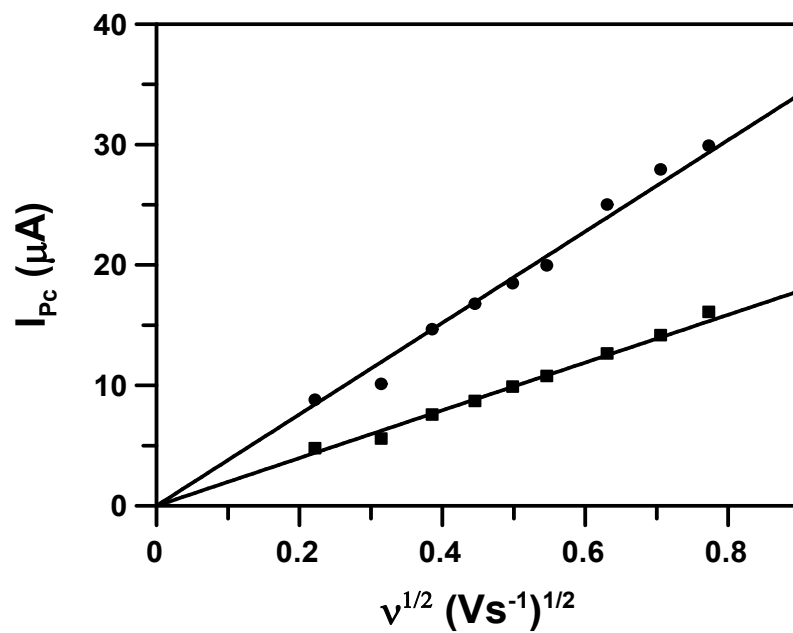

Fig. S6 Dependence of cathodic peak current on square root of scan rate for the reduction of onz (■) and  $[Cu_2(oac)_4(onz)_2]$  (●) in pure methanol;  $T = 25$  °C.

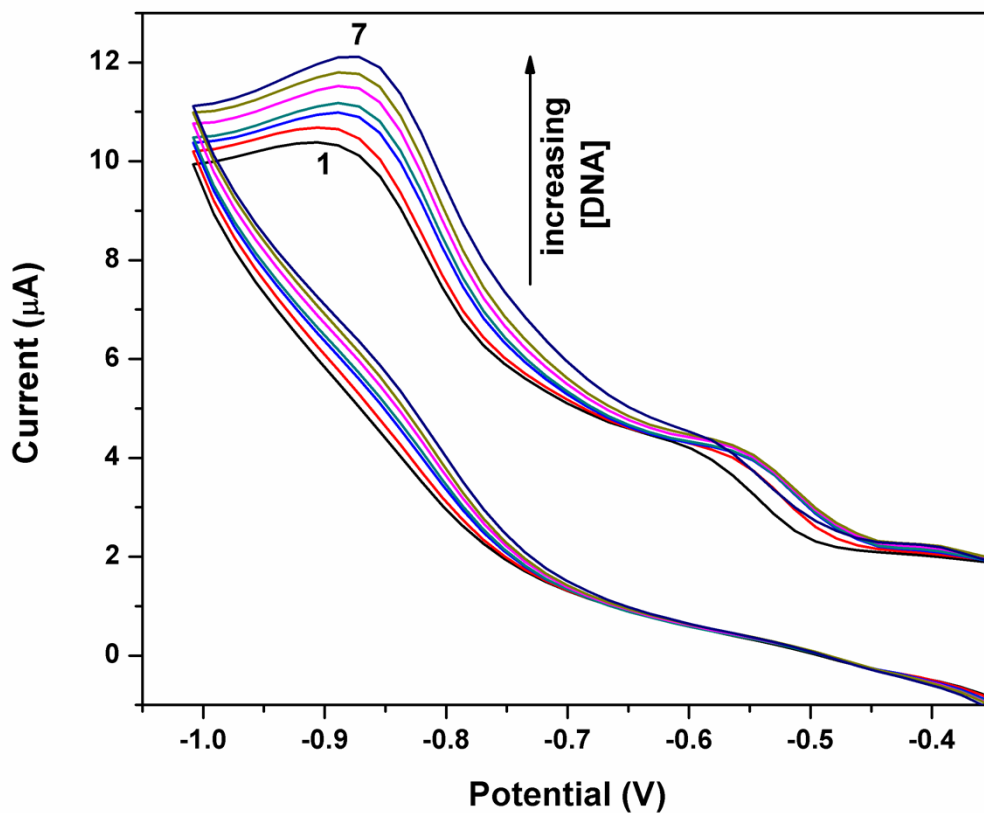

Fig. S7 Cyclic voltammograms for  $[\text{Cu}_2(\text{OAc})_4(\text{Onz})_2]$  in the absence (1) and presence of different concentrations of c t DNA, 70.55  $\mu\text{M}$  (2), 140.64  $\mu\text{M}$  (3), 279.43  $\mu\text{M}$  (4), 618.55  $\mu\text{M}$  (5), 946.87  $\mu\text{M}$  (6), 1783.26  $\mu\text{M}$  (7).  $[\text{Cu}_2(\text{OAc})_4(\text{Onz})_2] = 250 \mu\text{M}$ ;  $[\text{NaCl}] = 120 \text{ mM}$ ;  $\text{pH} = 7.4$ ;  $T = 25^\circ\text{C}$ .

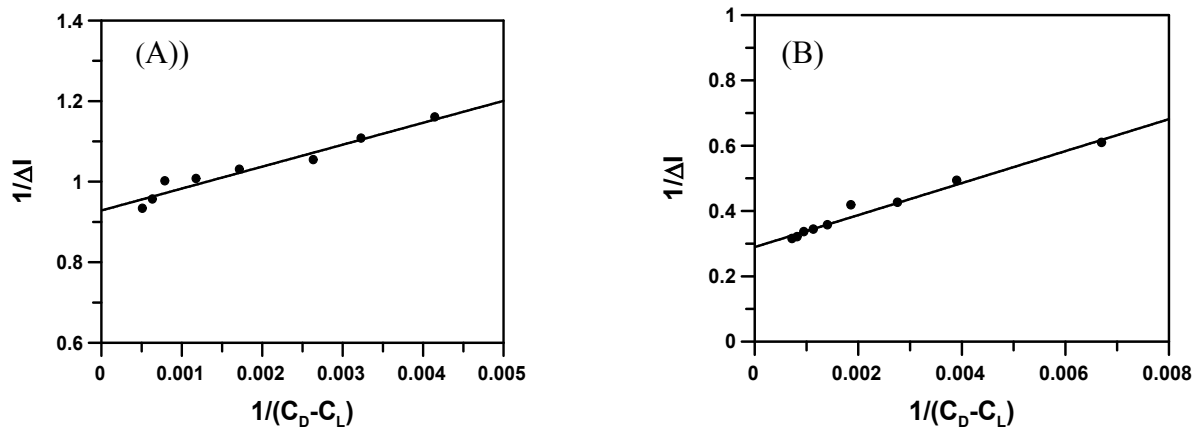

Fig. S8 Double reciprocal plots for the interaction of onz (A) and  $[\text{Cu}_2(\text{OAc})_4(\text{Onz})_2]$  (B) with c t DNA;  $[\text{Onz}] = [\text{Cu}_2(\text{OAc})_4(\text{Onz})_2] = 250 \mu\text{M}$ ,  $[\text{NaCl}] = 120 \text{ mM}$ ;  $\text{pH} = 7.4$ ;  $T = 25^\circ\text{C}$ .

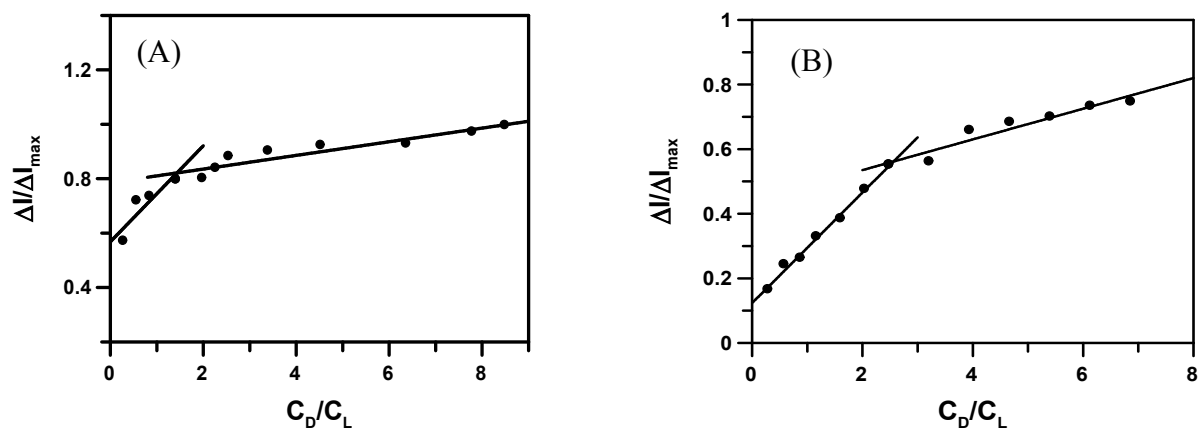

Fig. S9 Plot of normalized increase of peak current as a function of mole-ratio of c t DNA to Onz (A) and  $[\text{Cu}_2(\text{OAc})_4(\text{Onz})_2]$  (B) respectively.  $[\text{Onz}] = [\text{Cu}_2(\text{OAc})_4(\text{Onz})_2] = 250 \mu\text{M}$ ,  $[\text{NaCl}] = 120 \text{ mM}$ ;  $\text{pH} = 7.4$ ;  $T = 25^\circ\text{C}$ .

Table ST1: Selected bond distances (Å)

|     |     |          |
|-----|-----|----------|
| Cu1 | -O1 | 1.978(2) |
| Cu1 | -O2 | 1.961(1) |
| Cu1 | -O3 | 1.948(1) |
| Cu1 | -O4 | 1.981(1) |
| Cu1 | -N1 | 2.185(3) |

Table ST2: Selected bond angles (°)

|    |      |     |            |
|----|------|-----|------------|
| O1 | -Cu1 | -O2 | 88.72(7)   |
| O1 | -Cu1 | -O3 | 91.42(6)   |
| O1 | -Cu1 | -O4 | 167.91(11) |
| O1 | -Cu1 | -N1 | 93.39(11)  |
| O2 | -Cu1 | -O3 | 167.55(9)  |
| O2 | -Cu1 | -O4 | 90.37(6)   |
| O2 | -Cu1 | -N1 | 94.08(7)   |
| O3 | -Cu1 | -O4 | 86.90(5)   |
| O3 | -Cu1 | -N1 | 98.34(7)   |
| O4 | -Cu1 | -N1 | 98.70(8)   |

Table ST3: Hydrogen bond distances (Å) and angles (°)

| <b>D-H...A</b>  | <b>D-H</b> | <b>H...A</b> | <b>D...A</b> | <b>&lt;D-H...A</b> |
|-----------------|------------|--------------|--------------|--------------------|
| O7 -- H6 ... O5 | 0.85(4)    | 2.21(4)      | 3.032(5)     | 162(4)             |
| O7 -- H6 ... N3 | 0.85(4)    | 2.31(4)      | 3.131(4)     | 162(4)             |

D, donor; H, hydrogen; A, acceptor.

Table ST4: MIC values of Onz,  $[\text{Cu}_2(\text{OAc})_4(\text{Onz})_2]$  and different controls. The compounds were initially dissolved in DMSO and finally diluted to culture medium.

| Compound                                             | Bacterial Strains              |                      |                              |                      |
|------------------------------------------------------|--------------------------------|----------------------|------------------------------|----------------------|
|                                                      | <i>S. aureus</i><br>ATCC 29213 |                      | <i>E. coli</i><br>ATCC 25922 |                      |
|                                                      | Run 1                          | Run 2                | Run 1                        | Run 2                |
| Onz                                                  | 20.25 $\mu\text{M}$            | 40.5 $\mu\text{M}$   | 40.5 $\mu\text{M}$           | 20.25 $\mu\text{M}$  |
| $[\text{Cu}_2(\text{OAc})_4(\text{Onz})_2]$          | 20.25 $\mu\text{M}$            | 40.5 $\mu\text{M}$   | 40.5 $\mu\text{M}$           | 20.25 $\mu\text{M}$  |
| $\text{Cu}(\text{NO}_3)_2 \cdot 3\text{H}_2\text{O}$ | >162.0 $\mu\text{M}$           | >162.0 $\mu\text{M}$ | >162.0 $\mu\text{M}$         | >162.0 $\mu\text{M}$ |
| 1:1 mixture of Cu(II)<br>& Onz                       | 20.25 $\mu\text{M}$            | 40.5 $\mu\text{M}$   | 40.5 $\mu\text{M}$           | 20.25 $\mu\text{M}$  |
| $\text{Na}_2\text{EDTA}$                             | 81.0 $\mu\text{M}$             | 162.0 $\mu\text{M}$  | 81.0 $\mu\text{M}$           | 162.0 $\mu\text{M}$  |
| Cu(II)-EDTA<br>complex                               | 81.0 $\mu\text{M}$             | 162.0 $\mu\text{M}$  | 162.0 $\mu\text{M}$          | 162.0 $\mu\text{M}$  |
| $\text{Cu}(\text{OAc})_2 \cdot \text{H}_2\text{O}$   | >162.0 $\mu\text{M}$           | >162.0 $\mu\text{M}$ | >162.0 $\mu\text{M}$         | >162.0 $\mu\text{M}$ |



$$\frac{1}{\Delta I} = \frac{1}{\Delta I_{max}} + \frac{K_d}{\Delta I_{max}(C_D - C_0)} \quad (SE 1)$$

$$K_d = \frac{\left[ C_0 - \left( \frac{\Delta I}{\Delta I_{max}} \right) C_0 \right] \left[ C_D - \left( \frac{\Delta I}{\Delta I_{max}} \right) C_0 \right]}{\left( \frac{\Delta I}{\Delta I_{max}} \right) C_0} \quad (SE 2)$$

$$C_0 \left( \frac{\Delta I}{\Delta I_{max}} \right)^2 - (C_0 + C_D + K_d) \left( \frac{\Delta I}{\Delta I_{max}} \right) + C_D = 0 \quad (SE 3)$$

$$\frac{r}{C_f} = K \quad (n - r) \quad (SE 4)$$
